# Supplementary material for: Neurological findings in a cohort of adults with down syndrome
Source: Neurol Sci. 2025 May 13;46(8):3639–49. doi: 10.1007/s10072-025-08195-7 (PMC12267337; doi:10.1007/s10072-025-08195-7)
Supplement: Supplementary file 1 — Supplementary Material 1 [file 10072_2025_8195_MOESM2_ESM.xlsx]

## Sheet: Supplementary Table 1
Supplementary Table 1 reports the results of the following statistical analyses: Rows 6-8: association of the main neurological comorbidities and findings with demographic; the estimated effect, the p-value and the BH-corrected p-value (q-value) are reported for each test Rows 10-42: co-occurrence among neurological phenotypes and with other clinical comorbidities: the relative odds ratio obtaine…
		Neurocognitive disorder				Minor				Major				DSRD				Psychiatric disorder				Obsessive compulsive disorder				Psychosis				Depression				Others				Headaches				Epilepsies				TLoC
		Estimate	p-value	q-value		Estimate	p-value	q-value		Estimate	p-value	q-value		Estimate	p-value	q-value		Estimate	p-value	q-value		Estimate	p-value	q-value		Estimate	p-value	q-value		Estimate	p-value	q-value		Estimate	p-value	q-value		Estimate	p-value	q-value		Estimate	p-value	q-value		Estimate	p-value	q-value
Demographics
Age	continuous	1.31767	<0.00001	3.61067e-06		0.51569	0.26959	0.995741		1.39403	<0.00001	1.56769e-05		-0.54783	0.10806	0.688219		0.64314	0.01854	0.403233		0.04987	0.88061	0.995827		0.44456	0.3418	0.999082		0.67573	0.14667	0.837097		0.91204	0.12131	0.703607		0.38528	0.37068	0.995212		-0.21339	0.64902	0.997855		-0.17338	0.51623	0.92378
Education (years)	continuous	-0.44062	0.06919	0.421005		-0.3262	0.30631	0.995741		-0.28748	0.27427	0.701819		-0.04621	0.74003	0.996119		-0.07632	0.6112	0.936956		-0.09363	0.67615	0.973167		-0.35131	0.31303	0.999082		0.51305	0.10881	0.837097		-0.51291	0.33087	0.99494		0.23856	0.44818	0.995212		-0.09045	0.79766	0.997855		0.01987	0.91682	0.976741
ADL	continuous	-0.43874	0.13937	0.421005		1.21364	0.00384	0.334098		-1.08231	0.00021	0.00935077		-1.1646	0.05343	0.578183		-0.42446	0.06961	0.592668		-0.22252	0.41523	0.946496		-1.56533	0.00899	0.782505		0.54924	0.15663	0.837097		-0.72174	0.10302	0.665523		0.27306	0.44255	0.995212		-0.20181	0.63616	0.997855		-0.01739	0.93888	0.984127
Main neurological comorbidities
Neurocognitive disorder	categorical	-	-	NA		-	-	0.995741		-	0.99381	0.995299		1.49251	0.99282	0.996119		1.96915	0.33382	0.931724		0.45227	0.39361	0.946496		1.58302	0.71494	0.999082		2.04217	0.55474	0.997154		9.78219	0.09282	0.665523		0	0.99158	0.995212		22.5349	0.02955	0.822499		0.84241	0.83462	0.92814
Minor	categorical	-	-	0.996244		-	-	NA		-	0.99445	0.995299		0	0.9957	0.996119		0.25155	0.23755	0.931724		0	0.9934	0.995827		3.17683	0.36308	0.999082		0	0.99544	0.997154		0	0.99459	0.99494		0	0.99493	0.995212		4.37124	0.24446	0.862258		1.83841	0.52902	0.92378
Major	categorical	-	-	0.996244		-	-	0.995741		-	-	NA		3.24418	0.99316	0.996119		5.24012	0.04221	0.592668		0.95362	0.96002	0.995827		0.28056	0.5183	0.999082		4.05828	0.24967	0.874368		21.1451	0.02577	0.465018		0	0.99169	0.995212		6.80097	0.18318	0.854832		0.3721	0.31426	0.92378
DSRD	categorical	1.27026	0.99445	0.996244		0	0.99563	0.995741		2.99429	0.9953	0.995299		-	-	NA		0.40669	0.99555	0.997164		0	0.99572	0.995827		4.22167	0.99551	0.999082		0	0.99544	0.997154		0	0.99462	0.99494		0	0.99506	0.995212		0	0.9952	0.997855		0.38572	0.49555	0.92378
Psychiatric disorder	categorical	1.85214	0.35705	0.705989		0.24251	0.22568	0.995741		4.22699	0.05669	0.411008		0.4127	0.99232	0.996119		-	-	NA		-	-	0.995827		-	-	0.999082		-	-	0.997154		-	-	0.99494		0.5784	0.5456	0.995212		3.35576	0.27595	0.868613		0.6226	0.34208	0.92378
Obsessive compulsive disorder	categorical	0.33577	0.26484	0.586267		0	0.99277	0.995741		0.63879	0.65338	0.916838		0	0.99279	0.996119		-	-	0.997164		-	-	NA		0	0.99277	0.999082		0	0.99275	0.997154		0	0.9914	0.99494		1.05987	0.95988	0.995212		0	0.9928	0.997855		0.50873	0.4172	0.92378
Psychosis	categorical	1.03617	0.97549	0.996244		3.27658	0.34013	0.995741		0.41318	0.50431	0.769737		4.47118	0.99568	0.996119		-	-	0.997164		0	0.99341	0.995827		-	-	NA		0	0.99546	0.997154		0	0.99462	0.99494		2.59919	0.44074	0.995212		4.28159	0.24842	0.862258		1.83183	0.53008	0.92378
Depression	categorical	2.66722	0.40245	0.734527		0	0.99548	0.995741		5.23917	0.18751	0.632739		0	0.99574	0.996119		-	-	0.997164		0	0.99574	0.995827		0	0.99521	0.999082		-	-	NA		0	0.99452	0.99494		0	0.99479	0.995212		4.59969	0.23583	0.862258		0	0.99397	0.996143
Others	categorical	12.0173	0.06722	0.421005		0	0.99283	0.995741		30.2067	0.02038	0.253261		0	0.99323	0.996119		-	-	0.997164		0	0.99322	0.995827		0	0.99513	0.999082		0	0.99528	0.997154		-	-	NA		0	0.99469	0.995212		3.87955	0.39705	0.997855		1.32869	0.96176	0.996113
Headaches	categorical	0	0.99342	0.996244		0	0.99547	0.995741		0	0.99448	0.995299		0	0.99561	0.996119		0.59647	0.55461	0.936956		1.10123	0.9334	0.995827		2.60194	0.44016	0.999082		0	0.99542	0.997154		0	0.99457	0.99494		-	-	NA		0	0.99551	0.997855		2.93606	0.21804	0.92378
Epilepsies	categorical	43.5033	0.02208	0.405011		4.71673	0.23026	0.995741		15.4969	0.10679	0.619375		0	0.99555	0.996119		3.53099	0.26485	0.931724		0	0.99343	0.995827		4.36161	0.2426	0.999082		4.93173	0.2213	0.837097		4.55096	0.37737	0.99494		0	0.99518	0.995212		-	-	NA		1.67401	0.59192	0.92378
TLoC	categorical	0.98044	0.97912	0.996244		1.95615	0.48967	0.995741		0.61881	0.56963	0.825967		0.42377	0.57654	0.996119		0.63515	0.35149	0.931724		0.51168	0.42095	0.946496		1.9088	0.50434	0.999082		0	0.99247	0.997154		1.56774	0.89718	0.99494		3.04295	0.20617	0.995212		1.68264	0.58743	0.997855		-	-	NA
Sleep disorders	categorical	0.21381	0.22993	0.540637		0	0.99549	0.995741		0.37324	0.44607	0.722721		0	0.9956	0.996119		9.704	0.06045	0.592668		3.10828	0.22943	0.831693		2.69805	0.42057	0.999082		2.59064	0.44328	0.997154		0	0.67233	0.99494		0	0.99501	0.995212		0	0.99553	0.997855		1.32744	0.75679	0.92814
Neurological physical examination
No significant signs	categorical	1.22224	0.76838	0.996244		1.05257	0.95731	0.995741		1.22563	0.78162	0.995299		0.68762	0.93896	0.996119		0.85574	0.61085	0.936956		0.83762	0.79474	0.995827		0.36266	0.3782	0.999082		2.6593	0.31265	0.877435		0.78562	0.55731	0.99494		0	0.99145	0.995212		6.74308	0.09653	0.854832		1.31545	0.61018	0.92378
Hypokinetic disorder	categorical	1.02032	0.97774	0.996244		1.217	0.8448	0.995741		0.91608	0.90788	0.995299		2.41641	0.82194	0.996119		2.44488	0.15172	0.805968		2.76559	0.15621	0.831693		13.0063	0.03409	0.988722		0	0.99127	0.997154		1.42401	0.79716	0.99494		2.45211	0.3418	0.995212		0	0.99161	0.997855		0.31008	0.12623	0.92378
Stereotypic movements	categorical	3.10744	0.15319	0.421005		2.28327	0.39536	0.995741		2.0893	0.36773	0.710577		32.0354	0.00767	0.307573		1.21956	0.83955	0.973879		1.32302	0.70799	0.977706		5.76929	0.07115	0.999082		0	0.99247	0.997154		0.54832	0.50878	0.99494		0.60831	0.66417	0.995212		0.85959	0.89622	0.997855		0.51238	0.34373	0.92378
Tics	categorical	1.77148	0.61904	0.882899		0	0.99302	0.995741		4.32179	0.25775	0.679534		1.36813	0.68515	0.996119		2.54868	0.33363	0.931724		9.26219	0.00956	0.551884		0	0.99294	0.999082		0	0.993	0.997154		0	0.99463	0.99494		1.91281	0.58553	0.995212		0	0.99279	0.997855		0.73752	0.72865	0.92814
Tremor	categorical	0.83935	0.91357	0.996244		0	0.99573	0.995741		1.32322	0.86528	0.995299		0	0.99612	0.996119		-	0.99655	0.997164		10.8507	0.17117	0.831693		0	0.99688	0.999082		0	0.99715	0.997154		7.58423	0.18983	0.857579		9.80695	0.1452	0.995212		0	0.99722	0.997855		0	0.99614	0.996143
Cerebellar signs	categorical	0	0.99624	0.996244		0	0.99574	0.995741		0	0.99501	0.995299		7.04043	0.11866	0.688219		0.75681	0.79404	0.96673		2.84799	0.41065	0.946496		0	0.99574	0.999082		0	0.99573	0.997154		0	0.99494	0.99494		6.38999	0.16355	0.995212		0	0.99575	0.997855		0	0.99442	0.996143
Nystagmus	categorical	2.08941	0.51622	0.841586		2.66802	0.43578	0.995741		1.09565	0.94615	0.995299		0	0.9926	0.996119		0.1977	0.3596	0.931724		0.62678	0.6786	0.973167		0	0.9927	0.999082		2.77196	0.42848	0.997154		0	0.99444	0.99494		1.59791	0.69446	0.995212		0	0.99238	0.997855		1.59292	0.5254	0.92378
Main clinical comorbidities
Visual impairment	categorical	1.58186	0.49773	0.841586		1.19733	0.85052	0.995741		1.53232	0.55669	0.820878		1.48806	0.95413	0.996119		0.41807	0.15749	0.805968		0.57354	0.40063	0.946496		0.48951	0.45358	0.999082		1.22041	0.8361	0.997154		0.34916	0.46285	0.99494		0.35063	0.24801	0.995212		0.46165	0.41612	0.997855		0.48925	0.18516	0.92378
Hearing impairment	categorical	1.0389	0.9657	0.996244		0	0.99266	0.995741		1.99755	0.44859	0.722721		0	0.99311	0.996119		1.60113	0.56648	0.936956		3.78522	0.11196	0.831693		0	0.99216	0.999082		1.21619	0.87256	0.997154		0.83948	0.83596	0.99494		1.0692	0.95648	0.995212		2.0677	0.55424	0.997855		1.38566	0.68008	0.92378
Thyroid disease	categorical	1.01896	0.97781	0.996244		1.17516	0.86653	0.995741		0.93025	0.92109	0.995299		2.26619	0.5642	0.996119		0.98297	0.80005	0.96673		0.43706	0.2267	0.831693		1.21332	0.84072	0.999082		3.31505	0.30151	0.874368		1.46978	0.41013	0.99494		0.35432	0.26307	0.995212		4.30765	0.20835	0.862258		0.67053	0.45854	0.92378
Heart disease	categorical	0.95913	0.96268	0.996244		1.16407	0.89807	0.995741		0.85673	0.87701	0.995299		0.58084	0.74875	0.996119		0.97968	0.67349	0.936956		1.56317	0.55736	0.973167		1.07623	0.95031	0.999082		1.21861	0.86888	0.997154		1.06942	0.79325	0.99494		0.82012	0.86339	0.995212		0.8206	0.86678	0.997855		1.82843	0.33193	0.92378
Obesity	categorical	6.14112	0.03259	0.405011		0.55966	0.62567	0.995741		10.0496	0.01241	0.199449		7.55774	0.11425	0.688219		1.41787	0.61875	0.936956		0	0.99263	0.995827		1.32939	0.81416	0.999082		4.1834	0.15898	0.837097		5.45879	0.10598	0.665523		0.92354	0.94611	0.995212		0	0.99206	0.997855		0.14125	0.07308	0.92378
Thyroid therapy	categorical	0.64025	0.51808	0.841586		0.4887	0.45941	0.995741		0.9138	0.90196	0.995299		2.5131	0.48783	0.996119		1.37878	0.36778	0.931724		0.73226	0.63978	0.973167		1.26531	0.80761	0.999082		3.41505	0.2908	0.874368		1.48363	0.3908	0.99494		0.36578	0.28141	0.995212		4.72766	0.18298	0.854832		0.40255	0.10315	0.92378
Antidepressants	categorical	0.64008	0.55433	0.841586		0	0.99223	0.995741		1.44517	0.62913	0.89729		14.869	0.01947	0.40644		5.01354	0.01428	0.403233		1.2334	0.7816	0.995827		1.84281	0.54365	0.999082		13.1529	0.02955	0.837097		1.02388	0.42192	0.99494		0.447	0.50028	0.995212		0.83225	0.87727	0.997855		0.25346	0.09935	0.92378
Antiepileptics	categorical	75.9295	0.02208	0.405011		3.5493	0.23026	0.995741		25.4257	0.10679	0.632739		3.6561	0.99555	0.996119		7.76179	0.26485	0.874665		0	0.99343	0.995827		13.4317	0.2426	0.999082		3.51186	0.2213	0.837097		2.71522	0.37737	0.99494		0	0.99518	0.995212		-	0.99974	0.997855		0.62131	0.59192	0.961589
Antipshychotics	categorical	0.72715	0.6674	0.921649		0	0.99208	0.995741		1.7363	0.46152	0.730047		2.49188	0.82957	0.996119		8.49934	0.00182	0.15854		3.25125	0.09734	0.831693		14.4277	0.02561	0.988722		0	0.99175	0.997154		4.71149	0.02673	0.465018		0.37475	0.4229	0.995212		0	0.99203	0.997855		0.66644	0.54921	0.92378
Sedative hypnotics	categorical	6.36734	0.15969	0.421005		0	0.99555	0.995741		18.0619	0.06492	0.412892		3.874	0.99565	0.996119		2.32802	0.42809	0.936956		4.22974	0.14435	0.831693		3.46988	0.32058	0.999082		0	0.99551	0.997154		0	0.99468	0.99494		0	0.99508	0.995212		4.10167	0.25769	0.862258		1.81049	0.53596	0.92378
Mood stabilizers	categorical	2.15275	0.56106	0.841586		0	0.9956	0.995741		4.27844	0.30699	0.710577		0	0.99574	0.996119		-	0.99453	0.997164		0	0.99582	0.995827		4.5418	0.24173	0.999082		0	0.99555	0.997154		-	0.00364	0.158321		0	0.99509	0.995212		0	0.99564	0.997855		2.80877	0.32341	0.92378
Blood analysis
Total WBC count (10^9/L)	continuous	0.71243	0.05509	0.421005		-0.22053	0.76329	0.995741		0.87095	0.02655	0.288777		0.23117	0.56146	0.996119		-0.06066	0.75545	0.956009		-0.19625	0.59317	0.973167		-0.43885	0.40808	0.999082		-0.05363	0.91188	0.997154		0.70576	0.37281	0.99494		0.24848	0.57295	0.995212		-0.47934	0.31163	0.934885		0.06158	0.83557	0.92814
Neutrophils (10^9/L)	continuous	0.57767	0.12075	0.421005		-0.59033	0.41756	0.995741		0.82958	0.03441	0.33267		-0.03008	0.85862	0.996119		-0.28053	0.27196	0.931724		-0.47434	0.19245	0.831693		-0.44991	0.39482	0.999082		0.31569	0.51271	0.997154		0.29303	0.95943	0.99494		0.17971	0.68275	0.995212		-0.34045	0.47196	0.997855		-0.07398	0.80246	0.92814
Lymphocytes (10^9/L)	continuous	0.53233	0.15523	0.421005		0.67209	0.35772	0.995741		0.39988	0.31728	0.710577		0.55166	0.11213	0.688219		0.31632	0.28065	0.931724		0.34151	0.35188	0.946496		-0.086	0.87174	0.999082		-0.62328	0.19571	0.837097		0.90675	0.07139	0.664966		0.28822	0.51349	0.995212		-0.2821	0.55316	0.997855		0.15489	0.60167	0.92378
Hemoglobin (g/dL)	continuous	-0.38803	0.30221	0.641284		-0.19336	0.79201	0.995741		-0.38038	0.34166	0.710577		-0.14491	0.77599	0.996119		-0.25321	0.37073	0.931724		-0.04037	0.91271	0.995827		-0.3074	0.56335	0.999082		-0.22654	0.64029	0.997154		-0.14467	0.7296	0.99494		-0.02536	0.95423	0.995212		-0.32424	0.49529	0.997855		-0.16427	0.57981	0.92378
Mean Corpuscular Volume (fL)	continuous	0.42286	0.25928	0.586267		0.46818	0.5215	0.995741		0.33734	0.3983	0.710577		-0.82598	0.02336	0.40644		0.17782	0.42345	0.936956		0.09741	0.7908	0.995827		0.3788	0.47497	0.999082		0.60353	0.20934	0.837097		-0.38057	0.45137	0.99494		0.27089	0.53824	0.995212		0.57871	0.22034	0.862258		0.31	0.29323	0.92378
Platelet count (10^9/L)	continuous	0.65293	0.0693	0.421005		-0.05912	0.93343	0.995741		0.75534	0.04743	0.375106		0.15052	0.91823	0.996119		0.5138	0.08722	0.632333		0.27657	0.43517	0.946496		0.28957	0.57271	0.999082		-0.02406	0.95903	0.997154		0.48287	0.2163	0.868239		-0.25994	0.54153	0.995212		0.80811	0.07475	0.854832		0.08897	0.75621	0.92814
C-Reactive Protein (mg/dL)	continuous	0.78212	0.03237	0.405011		-0.22956	0.7542	0.995741		0.95165	0.01376	0.199449		0.79246	0.28026	0.996119		-0.08055	0.66786	0.936956		-0.51538	0.1576	0.831693		0.04332	0.93513	0.999082		0.20288	0.67527	0.997154		0.32924	0.59923	0.99494		-0.14413	0.74395	0.995212		-0.32692	0.49164	0.997855		0.21703	0.46307	0.92378
Hemoglobin A1C (HbA1c) (mmol/mol)	continuous	0.04364	0.90337	0.996244		0.30094	0.67033	0.995741		-0.03852	0.91974	0.995299		0.1688	0.90992	0.996119		-0.08167	0.37222	0.931724		0.37423	0.28918	0.912861		-0.12397	0.80916	0.999082		-0.65113	0.16011	0.837097		-0.6705	0.25095	0.941266		0.26233	0.53718	0.995212		-0.66195	0.14601	0.854832		0.06506	0.81997	0.92814
Folate (ng/ml)	continuous	-0.19213	0.59451	0.862039		-0.32301	0.64942	0.995741		-0.12299	0.74886	0.995299		0.94266	0.00651	0.307573		0.02757	0.99714	0.997164		-0.45281	0.20106	0.831693		0.28419	0.58143	0.999082		-0.15915	0.73474	0.997154		0.77265	0.19108	0.857579		-0.48986	0.24978	0.995212		-0.63689	0.16443	0.854832		-0.057	0.84279	0.92814
Vitamin B12 (pg/ml)	continuous	0.04228	0.90529	0.996244		-0.14537	0.83529	0.995741		0.09027	0.81116	0.995299		0.62039	0.05981	0.578183		-0.0845	0.96771	0.997164		-0.61842	0.07383	0.831693		-0.00058	0.99908	0.999082		0.10549	0.81937	0.997154		0.56558	0.07643	0.664966		-0.44143	0.29199	0.995212		-0.35853	0.42863	0.997855		0.22894	0.41662	0.92378
Thyroid-Stimulating Hormone (TSH) (microU/ml)	continuous	0.08064	0.82855	0.996244		-0.03283	0.96427	0.995741		0.10079	0.79908	0.995299		0.84783	0.01061	0.307573		0.26335	0.10363	0.693549		0.53326	0.14314	0.831693		0.1133	0.83129	0.999082		0.21479	0.65713	0.997154		0.19591	0.83042	0.99494		0.04869	0.9121	0.995212		-0.45333	0.33903	0.983178		-0.443	0.13103	0.92378
Free Triiodothyronine (FT3) (pg/mL)	continuous	-0.20641	0.55223	0.841586		0.32981	0.62955	0.995741		-0.32977	0.37096	0.710577		-0.30842	0.41482	0.996119		-0.66485	0.00466	0.202755		-0.13054	0.70351	0.977706		-0.58905	0.23283	0.999082		-0.98347	0.02637	0.837097		-0.33228	0.38703	0.99494		0.07468	0.85611	0.995212		-0.30797	0.4875	0.997855		-0.37569	0.17098	0.92378
Free Thyroxine (FT4) (pg/mL)	continuous	-0.01865	0.96004	0.996244		-1.19217	0.09976	0.995741		0.32704	0.40743	0.710577		-0.0546	0.66781	0.996119		-0.07803	0.69728	0.936956		-0.39347	0.28182	0.912861		0.28651	0.58955	0.999082		-0.16246	0.73706	0.997154		0.46328	0.61612	0.99494		-0.14185	0.7476	0.995212		0.41549	0.38099	0.997855		-0.15331	0.60425	0.92378
Parathyroid Hormone (PTH) (pg/mL)	continuous	0.53273	0.14198	0.421005		0.3993	0.57898	0.995741		0.48594	0.20897	0.632739		1.32901	0.02955	0.428473		0.23027	0.49843	0.936956		-0.03415	0.92471	0.995827		0.62085	0.2323	0.999082		0.08372	0.8604	0.997154		0.19825	0.97092	0.99494		-0.29251	0.49917	0.995212		-0.14583	0.75522	0.997855		-0.56964	0.04668	0.92378
25-hydroxy Vitamin D (ng/mL)	continuous	-0.62583	0.0895	0.421005		-1.20127	0.09812	0.995741		-0.35757	0.36598	0.710577		-0.17109	0.6765	0.996119		0.16446	0.44035	0.936956		0.28909	0.43221	0.946496		0.00071	0.99893	0.999082		0.19734	0.68613	0.997154		0.06287	0.90479	0.99494		0.04941	0.91139	0.995212		-0.40404	0.39558	0.997855		0.14905	0.61585	0.92378
Insulin (microU/mL)	continuous	0.22567	0.54356	0.841586		-0.15136	0.83622	0.995741		0.29945	0.44812	0.722721		0.46694	0.94127	0.996119		0.39487	0.23808	0.931724		-0.11143	0.76146	0.995827		0.1193	0.82235	0.999082		0.26711	0.58043	0.997154		0.88343	0.14297	0.777421		-0.30054	0.49445	0.995212		-0.28009	0.55531	0.997855		-0.11365	0.7008	0.92378
Homocysteine (micromol/L)	continuous	-0.06874	0.86153	0.996244		-0.70899	0.44746	0.995741		0.06605	0.8764	0.995299		-0.35312	0.31956	0.996119		-0.23378	0.36472	0.931724		-0.03887	0.92914	0.995827		-0.38085	0.43508	0.999082		-0.18144	0.74384	0.997154		-0.13309	0.78278	0.99494		-0.05836	0.89547	0.995212		0.29115	0.50456	0.997855		0.22027	0.45333	0.92378
Prealbumin (mg/dL)	continuous	-0.57574	0.10963	0.421005		-0.27781	0.69783	0.995741		-0.57007	0.13693	0.632739		-0.93279	0.07396	0.643421		0.2234	0.48441	0.936956		0.3394	0.34267	0.946496		-0.1866	0.71938	0.999082		-0.05745	0.90334	0.997154		0.20709	0.71963	0.99494		0.09799	0.82009	0.995212		0.31509	0.49718	0.997855		-0.08889	0.75861	0.92814
Ferritin (ng(mL)	continuous	-0.61124	0.09162	0.421005		-0.98399	0.16937	0.995741		-0.404	0.29809	0.710577		-0.48729	0.36304	0.996119		0.13743	0.71209	0.938666		0.55285	0.12284	0.831693		-0.3731	0.47538	0.999082		-0.69911	0.13898	0.837097		0.3814	0.52077	0.99494		-0.20256	0.64072	0.995212		-0.27834	0.55207	0.997855		-0.13612	0.64048	0.92378
Transferrin Saturation (%)	continuous	0.5193	0.15256	0.421005		0.85434	0.233	0.995741		0.33787	0.38409	0.710577		-0.34992	0.75512	0.996119		-0.03691	0.6441	0.936956		0.0476	0.89521	0.995827		-0.5025	0.33477	0.999082		-0.66632	0.15818	0.837097		0.28298	0.26008	0.941266		-0.64526	0.1331	0.995212		0.67949	0.14288	0.854832		-0.10008	0.73102	0.92814
Transferrin (mg/dL)	continuous	-0.05382	0.87547	0.996244		-0.10895	0.87194	0.995741		-0.02906	0.93659	0.995299		0.10596	0.65946	0.996119		0.22031	0.32766	0.931724		0.13933	0.68081	0.973167		-0.72679	0.13473	0.999082		0.83015	0.05915	0.837097		0.14308	0.57847	0.99494		-0.4543	0.26157	0.995212		0.18298	0.67659	0.997855		-0.34527	0.20317	0.92378
Iron (microg/dL)	continuous	0.53601	0.14682	0.421005		0.95694	0.18884	0.995741		0.32681	0.40838	0.710577		-0.40455	0.69771	0.996119		0.15866	0.83569	0.973879		0.07076	0.84746	0.995827		-0.6648	0.20874	0.999082		-0.37921	0.43284	0.997154		0.46826	0.07642	0.664966		-0.87011	0.04502	0.995212		0.66641	0.15836	0.854832		-0.22801	0.44075	0.92378
Creatine phosphokinase (CPK) (U/L)	continuous	-0.55886	0.11484	0.421005		-0.59665	0.3959	0.995741		-0.45787	0.2265	0.632739		-0.40111	0.64042	0.996119		0.01581	0.83006	0.973879		0.16162	0.64725	0.973167		-0.57396	0.25935	0.999082		-0.49589	0.28471	0.874368		0.37379	0.33603	0.99494		-0.55941	0.18405	0.995212		-0.42105	0.35601	0.997855		-0.15129	0.59499	0.92378
Gamma-Glutamyl Transferase (GGT) (U/L)	continuous	0.72811	0.04194	0.421005		1.08756	0.12549	0.995741		0.50594	0.18833	0.632739		0.09551	0.66592	0.996119		0.15232	0.51895	0.936956		0.23996	0.50368	0.973167		0.34412	0.5076	0.999082		-0.4081	0.38747	0.991472		0.26478	0.66649	0.99494		-0.5542	0.19584	0.995212		0.20901	0.65325	0.997855		-0.3575	0.21428	0.92378
Alanine Transaminase (ALT) (U/L)	continuous	0.33218	0.37125	0.708207		0.12432	0.86543	0.995741		0.33942	0.39045	0.710577		-0.00664	0.75371	0.996119		0.01124	0.99716	0.997164		0.60782	0.09454	0.831693		-0.42997	0.41806	0.999082		-0.59368	0.21771	0.837097		0.01632	0.85562	0.99494		-0.23301	0.59728	0.995212		0.02875	0.95189	0.997855		-0.19172	0.51716	0.92378
Aspartate Transferase (AST) (U/L)	continuous	0.49349	0.17456	0.446675		0.50005	0.48706	0.995741		0.41214	0.28781	0.710577		-0.22026	0.58614	0.996119		0.1126	0.50841	0.936956		0.41742	0.24557	0.854569		-0.55842	0.28352	0.999082		0.22303	0.63936	0.997154		0.00051	0.91093	0.99494		-0.52807	0.22068	0.995212		-0.04178	0.9289	0.997855		0.02904	0.92061	0.976741
Bilirubin, total (mg/dL)	continuous	-0.48136	0.19244	0.465055		-0.19451	0.79043	0.995741		-0.48765	0.21471	0.632739		-0.11957	0.74004	0.996119		-0.11985	0.55582	0.936956		0.47262	0.19476	0.831693		-0.43674	0.40973	0.999082		-0.60688	0.20654	0.837097		-0.1891	0.53614	0.99494		-0.15866	0.71865	0.995212		-0.64645	0.17051	0.854832		-0.21616	0.46404	0.92378
Bilirubin, direct (mg/dL)	continuous	-0.40839	0.26955	0.586267		0.13161	0.85725	0.995741		-0.50035	0.20262	0.632739		-0.02103	0.87515	0.996119		-0.20345	0.38554	0.931724		0.49832	0.17103	0.831693		-0.56296	0.28679	0.999082		-0.72414	0.13044	0.837097		-0.17641	0.47284	0.99494		-0.50149	0.25219	0.995212		-0.92714	0.04727	0.822499		-0.16673	0.57239	0.92378
Bilirubin, indirect (mg/dL)	continuous	-0.49148	0.18269	0.45411		-0.24983	0.73254	0.995741		-0.48294	0.21878	0.632739		-0.15673	0.68179	0.996119		-0.10984	0.57365	0.936956		0.47418	0.19284	0.831693		-0.42558	0.42142	0.999082		-0.59347	0.21644	0.837097		-0.19492	0.53241	0.99494		-0.06927	0.87496	0.995212		-0.62257	0.18669	0.854832		-0.24394	0.40788	0.92378
Total protein (g/dL)	continuous	-0.15998	0.63873	0.896277		0.36926	0.58177	0.995741		-0.28878	0.42472	0.722721		-0.08696	0.4787	0.996119		-0.05303	0.66607	0.936956		0.13815	0.68129	0.973167		0.13003	0.78948	0.999082		0.27692	0.53172	0.997154		-0.86472	0.05871	0.664966		-0.36562	0.3638	0.995212		-0.23269	0.59306	0.997855		-0.52279	0.05016	0.92378
Albumin (g/L)	continuous	-0.51075	0.08338	0.421005		-0.45378	0.43912	0.995741		-0.44517	0.15767	0.632739		-0.13707	0.78895	0.996119		0.06759	0.86474	0.989897		0.26758	0.36248	0.946496		-0.01636	0.96941	0.999082		-0.14601	0.70689	0.997154		-0.08108	0.67291	0.99494		0.01987	0.95522	0.995212		-0.53905	0.1545	0.854832		-0.32381	0.16959	0.92378
Magnesium (mg/dL)	continuous	0.34174	0.34793	0.703952		0.94186	0.18708	0.995741		0.11149	0.77416	0.995299		0.12822	0.8315	0.996119		0.15634	0.59759	0.936956		0.2119	0.55628	0.973167		0.41036	0.43056	0.999082		-0.19208	0.68589	0.997154		0.1896	0.88393	0.99494		-0.1765	0.68326	0.995212		-0.00859	0.98533	0.997855		0.31011	0.28371	0.92378
Inorganic phosphorus (mg/dL)	continuous	0.3652	0.32447	0.672109		-0.44178	0.54579	0.995741		0.54206	0.16738	0.632739		0.35254	0.99126	0.996119		0.50359	0.03763	0.592668		0.44398	0.22383	0.831693		0.83952	0.11037	0.999082		0.54859	0.25436	0.874368		-0.22031	0.59445	0.99494		0.26883	0.54135	0.995212		-0.51181	0.27955	0.868613		0.12589	0.67041	0.92378
Zinc (microg/dL)	continuous	-0.29462	0.4137	0.734527		-0.19758	0.78115	0.995741		-0.27554	0.47255	0.73414		-0.20454	0.98447	0.996119		-0.1656	0.3776	0.931724		0.69343	0.04811	0.831693		-0.7863	0.12395	0.999082		-0.29052	0.53587	0.997154		-0.71812	0.06799	0.664966		0.04858	0.90966	0.995212		-0.52104	0.2568	0.862258		-0.55322	0.0505	0.92378
Calcium (mg/dL)	continuous	-0.54537	0.11359	0.421005		-0.86381	0.20459	0.995741		-0.36459	0.32307	0.710577		-0.00226	0.94727	0.996119		-0.13386	0.65724	0.936956		-0.42415	0.2143	0.831693		-0.22012	0.65796	0.999082		0.29155	0.51911	0.997154		0.03989	0.59578	0.99494		-0.15187	0.71269	0.995212		-0.03312	0.94071	0.997855		0.26034	0.34565	0.92378
Potassium (mmol/L)	continuous	0.2062	0.57997	0.855209		-0.38911	0.5957	0.995741		0.34685	0.38045	0.710577		0.20858	0.80068	0.996119		-0.25133	0.36107	0.931724		-0.89381	0.01269	0.551884		0.48821	0.35782	0.999082		0.52494	0.2768	0.874368		-0.24051	0.79604	0.99494		-0.21884	0.62008	0.995212		0.1163	0.80726	0.997855		-0.2555	0.38772	0.92378
Sodium (mmol/L)	continuous	-0.94571	0.00645	0.28068		-0.04467	0.94948	0.995741		-1.0566	0.00409	0.118502		0.28277	0.65899	0.996119		-0.43023	0.07494	0.592668		0.5467	0.11821	0.831693		0.03885	0.93948	0.999082		-0.44516	0.33742	0.889568		-1.64948	0.00011	0.00976924		0.28889	0.49518	0.995212		-0.26322	0.56487	0.997855		0.12416	0.66282	0.92378
Total cholesterol (mg/dL)	continuous	0.57164	0.12116	0.421005		-0.24118	0.74213	0.995741		0.71699	0.06644	0.412892		-0.03023	0.66665	0.996119		0.59945	0.05808	0.592668		0.20517	0.57638	0.973167		0.06803	0.89829	0.999082		0.64378	0.18063	0.837097		0.40631	0.35679	0.99494		0.11462	0.79504	0.995212		1.16976	0.01162	0.822499		-0.48483	0.09792	0.92378
Triglycerides (mg/dL)	continuous	-0.26009	0.4847	0.841586		-0.50043	0.49457	0.995741		-0.14805	0.70883	0.978858		-0.03682	0.93193	0.996119		0.22289	0.49516	0.936956		0.30064	0.41276	0.946496		-0.12883	0.80888	0.999082		-0.01396	0.97704	0.997154		0.22165	0.75848	0.99494		0.15893	0.71892	0.995212		1.09265	0.01897	0.822499		-0.28783	0.33002	0.92378
HDL cholesterol (mg/dL)	continuous	0.22401	0.54759	0.841586		-0.28333	0.6994	0.995741		0.3361	0.39548	0.710577		-0.50441	0.29892	0.996119		-0.16469	0.60092	0.936956		-0.27547	0.45327	0.952628		-0.26968	0.61241	0.999082		0.20193	0.67701	0.997154		0.23515	0.91606	0.99494		1.08613	0.01156	0.995212		0.71223	0.1315	0.854832		0.52562	0.07253	0.92378
LDL cholesterol (mg/dL)	continuous	0.67489	0.06624	0.421005		-0.09541	0.89651	0.995741		0.7912	0.04224	0.367454		-0.10033	0.47064	0.996119		0.6231	0.06331	0.592668		0.23118	0.52902	0.973167		-0.01439	0.97844	0.999082		0.46719	0.33319	0.889568		0.54242	0.21955	0.868239		0.53114	0.22608	0.995212		0.95514	0.04129	0.822499		-0.20948	0.47892	0.92378
Uric Acid (mg/dL)	continuous	-0.30264	0.40603	0.734527		-1.35652	0.0553	0.995741		0.05383	0.8898	0.995299		0.26353	0.81907	0.996119		-0.3153	0.11882	0.738411		-0.19213	0.59364	0.973167		-0.0469	0.92838	0.999082		-0.19722	0.6778	0.997154		-0.59769	0.19714	0.857579		-0.0305	0.94381	0.995212		-0.20887	0.65436	0.997855		0.07073	0.80763	0.92814
Creatinine (mg/dL)	continuous	0.86662	0.01679	0.405011		-0.2089	0.7749	0.995741		1.0412	0.00651	0.1417		-0.15112	0.78651	0.996119		-0.07881	0.7692	0.956009		-0.209	0.5679	0.973167		-0.24295	0.64658	0.999082		-0.27685	0.56583	0.997154		0.5426	0.28535	0.954824		-0.24045	0.58409	0.995212		-0.18125	0.70234	0.997855		0.13924	0.637	0.92378
Estimated Glomerular Filtration Rate (eGFR) (mL/min)	continuous	-0.28345	0.37445	0.708207		0.36157	0.56561	0.995741		-0.42618	0.20769	0.632739		0.55307	0.05408	0.578183		-0.04119	0.76478	0.956009		0.09304	0.76837	0.995827		-0.4023	0.3775	0.999082		0.118	0.77681	0.997154		-0.22101	0.73608	0.99494		0.12469	0.74225	0.995212		-0.04311	0.91611	0.997855		-0.39298	0.11902	0.92378
Glucose (mg/dL)	continuous	0.54453	0.13958	0.421005		0.27662	0.7054	0.995741		0.53511	0.17281	0.632739		0.21398	0.72362	0.996119		0.20256	0.4774	0.936956		-0.27071	0.45989	0.952628		0.51775	0.32791	0.999082		-1.44885	0.00181	0.157114		0.78522	0.1071	0.665523		-0.14052	0.74971	0.995212		0.08231	0.86255	0.997855		0.13192	0.65546	0.92378
Tissue Transglutaminase IgA (U/mL)	continuous	-0.06246	0.86626	0.996244		-0.20345	0.77992	0.995741		-0.01096	0.97783	0.995299		-0.14029	0.81334	0.996119		-0.09486	0.73561	0.955191		-0.21622	0.5537	0.973167		-0.26988	0.60933	0.999082		0.727	0.12713	0.837097		-0.35493	0.4616	0.99494		-0.2583	0.55532	0.995212		0.81094	0.08257	0.854832		-0.22825	0.43819	0.92378
Total IgA (mg/dL)	continuous	-0.54254	0.13643	0.421005		-0.5095	0.47961	0.995741		-0.46372	0.23273	0.632739		-0.04918	0.62444	0.996119		-0.29598	0.28861	0.931724		-0.1483	0.68234	0.973167		0.70594	0.1747	0.999082		-0.59427	0.21007	0.837097		-0.51802	0.27048	0.941266		0.71846	0.09452	0.995212		-0.35968	0.44229	0.997855		0.21583	0.45987	0.92378
Protein electrophoresis alfa1 (%)	continuous	-0.1323	0.72312	0.967871		-0.13477	0.85443	0.995741		-0.11013	0.7815	0.995299		-0.08501	0.90169	0.996119		-0.216	0.44361	0.936956		-0.21101	0.56668	0.973167		-0.14263	0.78903	0.999082		-0.06804	0.88854	0.997154		-0.0457	0.87202	0.99494		-0.13557	0.75915	0.995212		-0.15916	0.73874	0.997855		-0.14166	0.63395	0.92378
Protein electrophoresis alfa2 (%)	continuous	0.52765	0.14524	0.421005		0.01356	0.98495	0.995741		0.59239	0.1236	0.632739		0.10197	0.73699	0.996119		0.21248	0.43778	0.936956		-0.24669	0.4934	0.973167		-0.20051	0.7006	0.999082		-0.16	0.73615	0.997154		1.19742	0.0093	0.269802		-0.18618	0.66686	0.995212		-0.00759	0.98703	0.997855		-0.11591	0.69062	0.92378
Protein electrophoresis beta1 (%)	continuous	0.07521	0.83918	0.996244		-0.58282	0.42261	0.995741		0.25536	0.51618	0.774273		0.69422	0.09	0.688219		0.05929	0.69342	0.936956		-0.07876	0.82954	0.995827		-0.3333	0.52794	0.999082		0.50478	0.29228	0.874368		0.23114	0.67138	0.99494		-0.0958	0.82715	0.995212		0.02482	0.95821	0.997855		0.06523	0.82521	0.92814
Protein electrophoresis beta2 (%)	continuous	-0.14061	0.68348	0.929105		-0.52901	0.43445	0.995741		-0.00429	0.99067	0.995299		0.34835	0.50813	0.996119		-0.36641	0.15378	0.805968		-0.35595	0.29379	0.912861		0.19047	0.6988	0.999082		0.0358	0.93637	0.997154		-0.53896	0.19065	0.857579		0.33268	0.41417	0.995212		0.13703	0.75591	0.997855		0.15522	0.57204	0.92378
Protein electrophoresis gamma (%)	continuous	0.08462	0.82043	0.996244		0.34946	0.63328	0.995741		-0.00651	0.98689	0.995299		-0.1179	0.45602	0.996119		0.06032	0.96197	0.997164		0.16025	0.66301	0.973167		0.21171	0.69054	0.999082		-0.09872	0.83851	0.997154		-0.42284	0.48131	0.99494		-0.37423	0.39507	0.995212		-0.20638	0.66462	0.997855		-0.11544	0.69748	0.92378
Protein electrophoresis A/G ratio	continuous	-0.62014	0.07757	0.421005		-0.59725	0.39223	0.995741		-0.52631	0.16091	0.632739		-0.55838	0.42287	0.996119		0.05534	0.70002	0.936956		0.31324	0.37126	0.946496		-0.3088	0.54285	0.999082		-0.33458	0.46866	0.997154		0.42976	0.50545	0.99494		0.17448	0.67879	0.995212		-0.14403	0.75151	0.997855		-0.0615	0.82845	0.92814
[truncated: 24 more columns]
